# Supplementary material
Source: PubMed Central journal article supplement (PMC2603565)

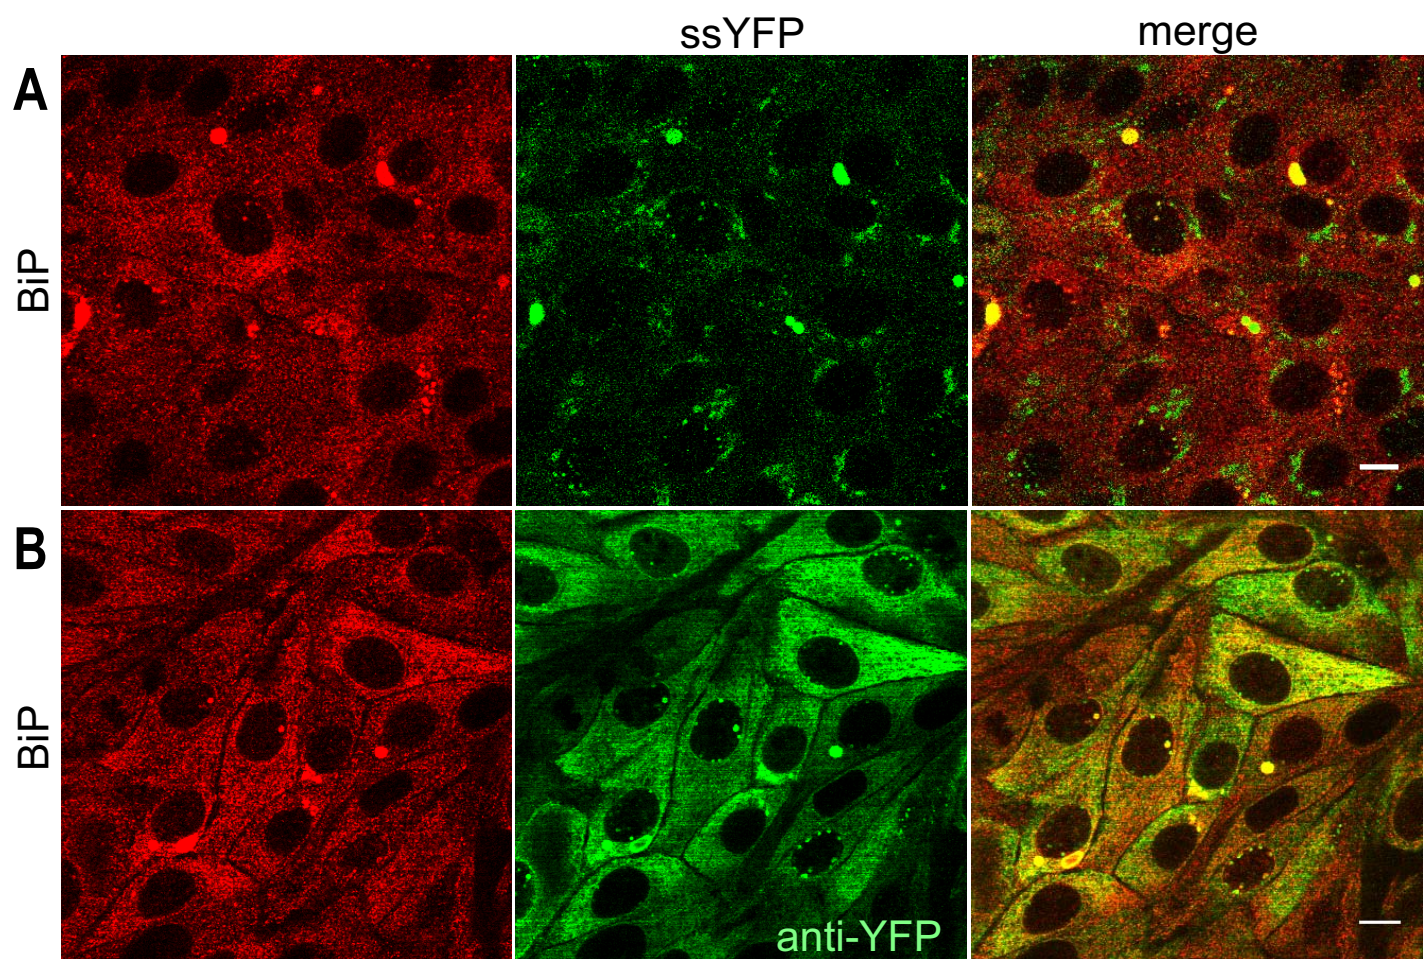

Supplement: 00344.2008_1.pdf [file 00344.2008_1.pdf]
